# Supplementary material
Source: PubMed Central journal article supplement (PMC5364301)
Supplement: IAI.00959-16_zii999092010s1.pdf [file IAI.00959-16_zii999092010s1.pdf]

**Table S1. Primers used in this study**

| # | Sequence (5' to 3')                             | Construct                      | Vector Template             | Insert Template | Pair |
|---|-------------------------------------------------|--------------------------------|-----------------------------|-----------------|------|
| 1 | ctttaagaaggagatatacatatggttagtaaagggaagaagat    | mCherry-LLO-His <sub>6</sub>   | pET29b-hly                  | pHpL3-mCherry   | 2    |
| 2 | gaatgcagatgcatccttcatatgtttatataattcatcataccacc | mCherry-LLO-His <sub>6</sub>   | pET29b-hly                  | pHpL3-mCherry   | 1    |
| 3 | ctttaagaaggagatatacatatggttagtaaagggaagaagat    | mCherry-C484A-His <sub>6</sub> | pET29b-hly <sup>C484A</sup> | pHpL3-mCherry   | 4    |
| 4 | gaatgcagatgcatccttcatatgtttatataattcatcataccacc | mCherry-C484A-His <sub>6</sub> | pET29b-hly <sup>C484A</sup> | pHpL3-mCherry   | 3    |

**Table S2. Bacterial strains used in this study**

| Strain Code | Parent Strain          | Description                          | Reference  |
|-------------|------------------------|--------------------------------------|------------|
| 10403S      | <i>L.monocytogenes</i> | Wild-type                            | (1)        |
| DP-L2261    | <i>L.monocytogenes</i> | $\Delta$ hly                         | (2)        |
| NF-L1177    | <i>L.monocytogenes</i> | PrfA* (G145S)                        | (3)        |
| DP-L6188    | <i>L.monocytogenes</i> | $\Delta$ gshF                        | (4)        |
| DP-L4351    | <i>L.monocytogenes</i> | LLO <sup>C484A</sup>                 | This Study |
| DP-L3903    | <i>L.monocytogenes</i> | Wild-type (ErmR)                     | (5)        |
| DP-E3570    | <i>E.coli</i>          | pET29b_hly                           | (6)        |
| DP-E6560    | <i>E.coli</i>          | pET29b_hly <sup>C484A</sup>          | This Study |
| DP-E6502    | <i>E.coli</i>          | pET29b_hly_mCherry                   | This Study |
| DP-E6504    | <i>E.coli</i>          | pET29b_hly <sup>C484A</sup> _mCherry | This Study |

**Figure S1.**

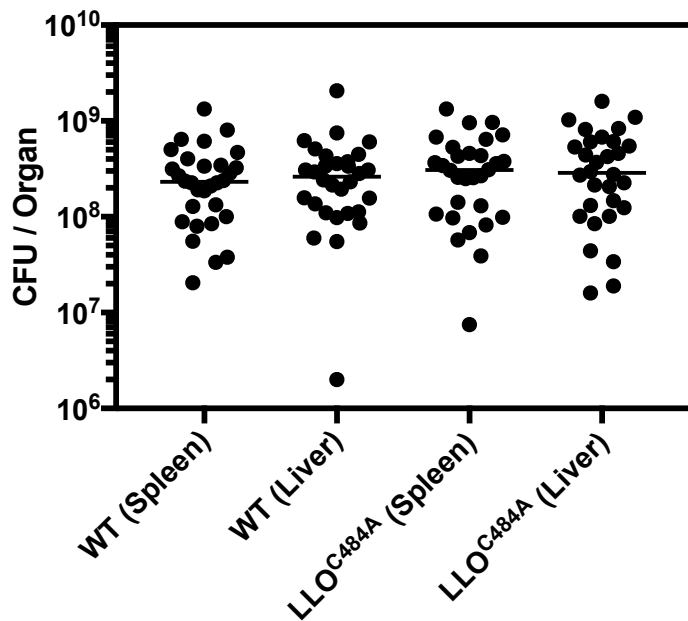

Figure S2.

A.

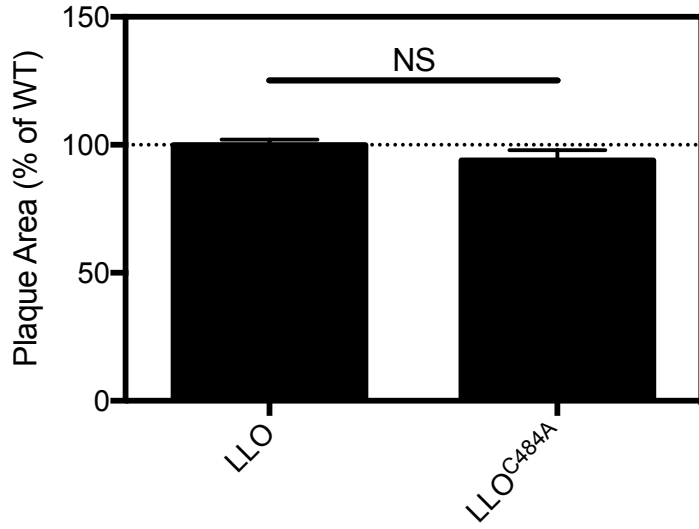

B.

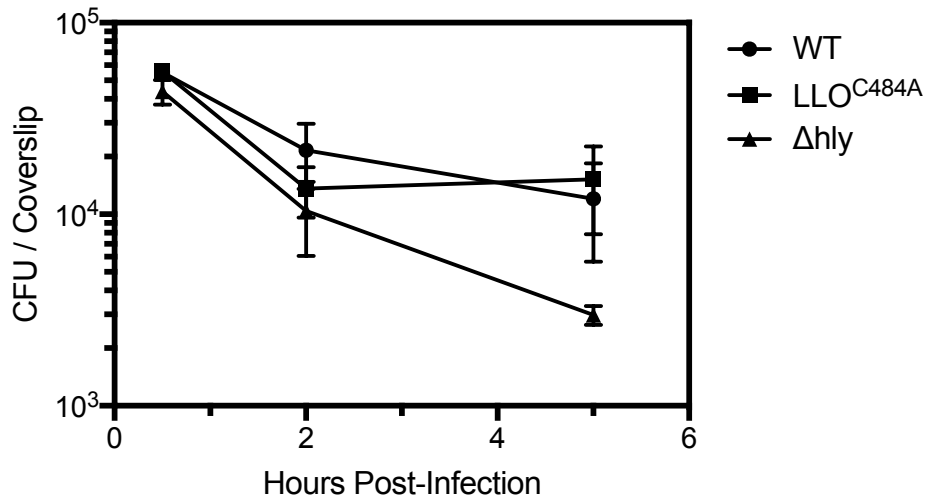

C.

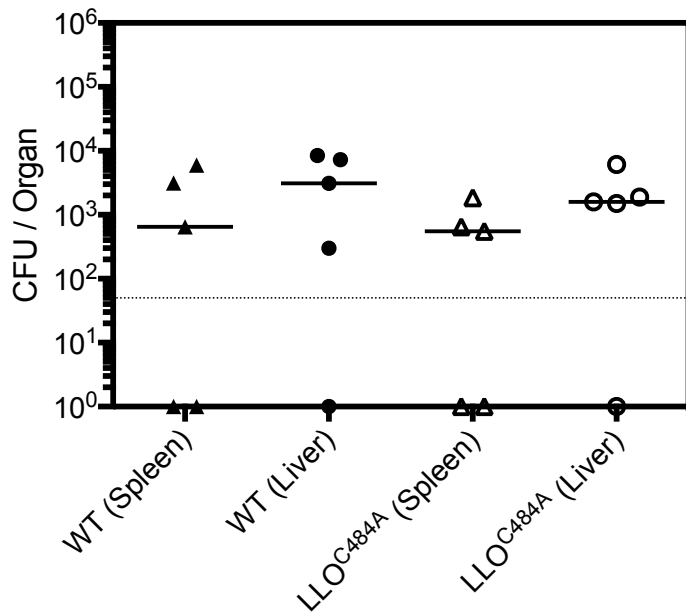

Figure S3.

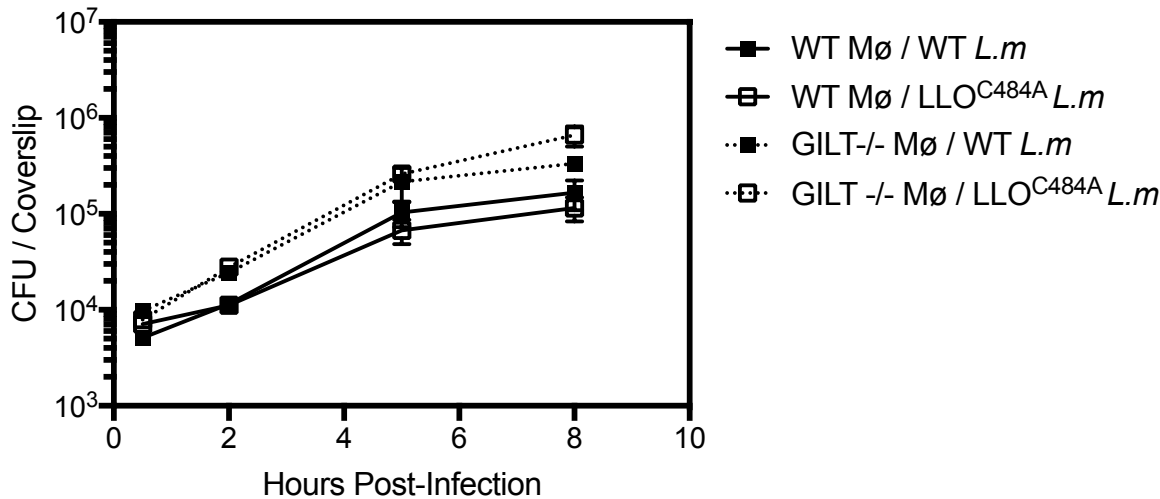

### Supplemental Figure Legends

#### Figure S1. Non-competitive infection masks the virulence defect of LLO<sup>C484A</sup> *in vivo*.

Mice were infected intravenously with  $1 \times 10^5$  CFU of either wild-type or LLO<sup>C484A</sup> mutant bacteria for 48hrs and the final CFU per liver and spleen were enumerated as described in Materials and Methods. Using this model, there is no statistically significant defect of the LLO<sup>C484A</sup> mutant *in vivo*, highlighting the sensitivity of the competitive model and the mild virulence defect of the LLO<sup>C484A</sup> strain.

#### Figure S2. Glutathionylation of LLO is largely dispensable in alternative infection models.

Several infection models were tested for their potential to accentuate the virulence defect of the LLO<sup>C484A</sup> mutant. **(A)** *In vitro* plaque assays were performed to monitor cell-to-cell spread of *L.monocytogenes* through a monolayer of immobilized L2 fibroblasts. **(B)** Intracellular growth in naturally restrictive resident peritoneal macrophages was assessed as described in supplemental Materials and Methods. **(C)** An *in vivo* oral infection model using contaminated bread was performed as described in supplemental Materials and Methods. No statistically significant defects were observed compared to wild-type bacteria in these models.

#### Figure S3. GILT is not required for efficient escape and replication of *L.monocytogenes* in bone-marrow derived macrophages.

Wild-type and LLO<sup>C484A</sup> *L.monocytogenes* were used to infect either wild-type or GILT<sup>-/-</sup> bone-marrow derived macrophages *in vitro*. CFU per coverslip ( $\sim 1.2 \times 10^5$  cells / coverslip) are reported at various time points after infection and representative of intracellular growth. Both strains of bacteria were able to efficiently replicate in GILT<sup>-/-</sup> BMMs.

### Supplemental Materials and Methods

#### Plaque assay

Plaque assays in L2 murine fibroblasts were performed as previously described (7). Briefly, bacterial cultures were grown overnight at 30 °C, then washed and diluted 1:10 in sterile PBS. Six-well dishes containing  $1.2 \times 10^6$  L2 cells per well were infected with *L. monocytogenes* for 1 h, then washed and overlaid with 3 ml of media containing 0.7% agarose and gentamicin ( $10 \mu\text{g ml}^{-1}$ ) to prevent extracellular growth. After 3 days at 37 °C, an overlay containing gentamicin and neutral red dye (Sigma) was added and stained overnight. The plates were then scanned and analyzed with ImageJ software (8).

#### Virulence experiments

Six-to-eight-week-old female CD-1 mice (The Jackson Laboratory) were either infected intravenously with  $1 \times 10^5$  colony-forming units (CFU) in 200ul of PBS or orally with  $1 \times 10^9$  CFU in contaminated bread, (as described previously (9)). Forty-eight hours post-infection the mice were euthanized and spleens and livers

were harvested, homogenized in 5mls or 10mls 0.1% NP-40, respectively, and plated for enumeration of bacterial burdens. All animal work was done in accordance with university regulations. Protocols were reviewed and approved by the Animal Care and Use Committee at the University of California, Berkeley (MAUP# R235-0815B).

#### **Intracellular Growth Curve of Peritoneal Macrophages**

Resident peritoneal cavity cells were harvested from six-to-eight-week-old female C57BL/6 mice as described previously (10). The peritoneal exudates were then plated for 3hrs and peritoneal macrophages were enriched for by discarding non-adherent cells. These cells were then collected using cell-scrapers and growth curves were performed as described previously (11).

## Supplemental References

1. **Bécavin C, Bouchier C, Lechat P, Archambaud C, Creno S, Gouin E, Wu Z, Kühbacher A, Brisse S, Pucciarelli MG, García-del Portillo F, Hain T, Portnoy DA, Chakraborty T, Lecuit M, Pizarro-Cerdá J, Moszer I, Bierne H, Cossart P.** 2014. Comparison of widely used *Listeria monocytogenes* strains EGD, 10403S, and EGD-e highlights genomic variations underlying differences in pathogenicity. *MBio* **5**:e00969–14.
2. **Jones S, Portnoy DA.** 1994. Characterization of *Listeria monocytogenes* pathogenesis in a strain expressing perfringolysin O in place of listeriolysin O. *Infection and Immunity* **62**:5608–5613.
3. **Miner MD, Port GC, Freitag NE.** 2008. Functional impact of mutational activation on the *Listeria monocytogenes* central virulence regulator PrfA. *Microbiology (Reading, Engl)* **154**:3579–3589.
4. **Reniere ML, Whiteley AT, Hamilton KL, John SM, Lauer P, Brennan RG, Portnoy DA.** 2015. Glutathione activates virulence gene expression of an intracellular pathogen. *Nature* **517**:170–173.
5. **Auerbuch V, Lenz LL, Portnoy DA.** 2001. Development of a competitive index assay to evaluate the virulence of *Listeria monocytogenes* actA mutants during primary and secondary infection of mice. *Infection and Immunity* **69**:5953–5957.
6. **Glomski IJ, Gedde MM, Tsang AW, Swanson JA, Portnoy DA.** 2002. The *Listeria monocytogenes* hemolysin has an acidic pH optimum to compartmentalize activity and prevent damage to infected host cells. *J Cell Biol* **156**:1029–1038.
7. **Sun AN, Camilli A, Portnoy DA.** 1990. Isolation of *Listeria monocytogenes* small-plaque mutants defective for intracellular growth and cell-to-cell spread. *Infection and Immunity* **58**:3770–3778.
8. **Schneider CA, Rasband WS, Eliceiri KW.** 2012. NIH Image to ImageJ: 25 years of image analysis. *Nature Methods* **9**:671–675.
9. **Bou Ghanem EN, Jones GS, Myers-Morales T, Patil PD, Hidayatullah AN, D'Orazio SEF.** 2012. InIA promotes dissemination of *Listeria monocytogenes* to the mesenteric lymph nodes during food borne infection of mice. *PLoS Pathog* **8**:e1003015.
10. **Ray A, Dittel BN.** 2010. Isolation of Mouse Peritoneal Cavity Cells. *JoVE*.
11. **Portnoy DA, Jacks SP, Hinrichs DJ.** 1988. Role of hemolysin for the intracellular growth of *Listeria monocytogenes*. *J Exp Med* **167**:1459.
